1 **Computation-guided redesign of promoter specificity of a bacterial RNA polymerase**

2

3 Xiangyang Liu<sup>1,‡</sup>, Anthony T. Meger<sup>2,3,‡</sup>, Thomas Gillis<sup>2,‡</sup>, and Srivatsan Raman<sup>2,3,4,5,\*</sup>

4

5

6 <sup>1</sup>Biophysics Graduate Program, University of Wisconsin-Madison, Madison, Wisconsin 53706, United  
7 States

8 <sup>2</sup>Department of Biochemistry, University of Wisconsin-Madison, Madison, Wisconsin 53706, United States

9 <sup>3</sup>Great Lakes Bioenergy Research Center, University of Wisconsin-Madison, Madison, Wisconsin 53706,  
10 United States

11 <sup>4</sup>Department of Bacteriology, University of Wisconsin-Madison, Madison, Wisconsin 53706, United States

12 <sup>5</sup>Department of Chemical and Biological Engineering, University of Wisconsin-Madison, Madison,  
13 Wisconsin 53706, United States

14 <sup>‡</sup>These authors contributed equally to this work

15

16 **Contact Information**

17 \*Corresponding author: Srivatsan Raman ([sraman4@wisc.edu](mailto:sraman4@wisc.edu))

18

19 **ABSTRACT**

20 The ability to regulate circuits and pathways is central to cellular control. The existing toolkit is  
21 predominantly comprised of local transcription regulators that are unsuitable for exerting control  
22 at a global genome-wide scale. Bacterial sigma factors are ideal global regulators as they direct  
23 the RNA polymerase to thousands of transcription sites. Here, we redesigned the promoter  
24 specificity of the *E. coli* housekeeping sigma factor, sigma-70, toward five orthogonal promoter  
25 targets not recognized by the native sigma-70. These orthogonal sigma-70s were engineered by  
26 screening a pooled library of computationally-guided designs customized toward each promoter  
27 target. A combination of conserved interactions with the DNA backbone and target-specific  
28 interactions facilitate new promoter recognition. Activity of the top performing redesigned sigma-  
29 70s varied across the promoter targets and ranged from 17% to 77% of native sigma-70 on its  
30 canonical active promoter. These orthogonal sigma factors represent a new suite of regulators  
31 for global transcriptional control.

32

33 **KEYWORDS: Protein-DNA interactions; Computational design; biological orthogonalization;**  
34 **specificity; high-throughput screening**

35

## 36 INTRODUCTION

37 Synthetic biology aims to control cellular behavior through synthetic pathways and circuits. These pathways  
38 and circuits depend on orthogonal gene regulation to selectively insulate them from host processes while  
39 sharing central dogma resources and machinery with the host.<sup>1-5</sup> In bacteria, native gene regulation is  
40 governed at the local and global levels.<sup>6-8</sup> At the local level, individual genes and operons are controlled by  
41 transcription factors that are activated by specific metabolites or environmental cues. These local regulators  
42 (i.e., small-molecule inducible transcription factors) have been co-opted and engineered to build a large  
43 toolkit of orthogonal gene regulatory components for synthetic circuits and pathways.<sup>9-12</sup> At a global level,  
44 the RNA polymerase (RNAP) is directed to hundreds to thousands of loci simultaneously by a battery of  
45 sigma factors to maintain homeostasis and respond to environmental changes.<sup>13</sup> In contrast to local  
46 regulators, efforts to engineer RNAP to exert control at a global level remain poorly developed. Although  
47 some genes or operons can be regulated from synthetic promoters with non-native regulation, large  
48 swathes of the bacterial genome, especially genes involved in core metabolic processes, require native  
49 regulation as they are often layered in complex networks that cannot be easily disentangled.<sup>3,14</sup> Orthogonal  
50 regulation in these genes can be introduced by modifying RNAP promoter specificities without disrupting  
51 native regulation.<sup>15</sup> With emerging technologies to synthesize genomes from scratch, genome-scale  
52 orthogonal gene regulation could be programmed into cells.<sup>16,17</sup> Such a system could have different RNAP  
53 promoter specificities encoded in different regions of the genome to compartmentalize them. Thus,  
54 redesigning the RNAP is a powerful but underexplored route to engineer orthogonal genetic regulation.

55  
56 The sigma subunit of the bacterial RNAP governs the interaction of the RNAP with the promoter.<sup>18-20</sup> The  
57 bacterial RNAP is a multi-subunit molecular machine composed of alpha, beta, omega, and sigma subunits.  
58 The alpha, beta, and omega subunits form the core RNAP enzyme responsible for RNA synthesis using  
59 DNA as a template and ribonucleotides as the substrate.<sup>21,22</sup> To initiate transcription, the core RNAP binds  
60 to a sigma factor which directs the RNAP to specific promoters.<sup>19,20,23,24</sup> Bacteria express several types of  
61 sigma factors that can recognize and bind specific promoters in response to cellular signals and  
62 environmental conditions.<sup>24-26</sup> Of the seven types of sigma factors in *E. coli*, sigma-70 is the dominant as it  
63 is responsible for expressing housekeeping genes, and the other sigma factors are only transiently

64 expressed during stress.<sup>27-32</sup> Prior strategies to engineer RNAP have used heterologous sigma factors from  
65 other hosts or constructed chimeras of native and non-native sigma factors to engineer new RNAP promoter  
66 specificities.<sup>33-35</sup> However, heterologous sigma factors are often toxic to the host, and chimeric sigma  
67 factors are not orthogonal, limiting the extent to which they may be used in synthetic systems.<sup>36,37</sup>  
68 Additionally, the use of heterologous and chimeric sigma factors is strain-dependent.<sup>33</sup> Despite the  
69 attractiveness of the sigma factor as a target for orthogonal genetic regulation, we do not have well-  
70 developed strategies to engineer them.

71

72 In this study, we redesigned the *E. coli* sigma-70 to recognize and transcribe from five orthogonal promoters  
73 that are transcriptionally inactive to wild-type sigma-70, using computation-guided design and pooled cell-  
74 based screens. We used Rosetta to create a customized library of computationally redesigned variants of  
75 the domain of *E. coli* sigma-70 that interacts with each promoter target. Fluorescence-activated cell sorting  
76 followed by deep sequencing of the sigma libraries revealed the sequence determinants of promoter  
77 specificity and how they changed for different targets. We found that recognition of new promoters occurs  
78 through a combination of highly conserved residues that likely make polar interactions with DNA backbone  
79 and target specific adaptations. We identified orthogonal sigma variants for each of the five targets whose  
80 activities ranged from 17-77% of wildtype sigma-70 on a highly active canonical *E. coli* promoter. Our  
81 workflow is generalizable and can be applied to alternative sigma factors in *E. coli* and sigma factors from  
82 other host organisms. The redesigned sigma factor-promoter pairs constitute an important tool for  
83 engineering orthogonal genetic regulation at the genome level.

84

## 85 RESULTS

### 86 The partitioned functional domains of sigma-70 enable targeted redesign of promoter specificity

87 As the “housekeeping” regulator of transcription in *E. coli*, sigma-70 performs three functions. First, sigma-  
88 70 must recognize the consensus -10 (TATAAT) and -35 (TTGACA) promoter elements. The -10 element  
89 is recognized by conserved domains 2 and 3, and the -35 element is recognized by the helix-turn-helix motif  
90 of domain 4 (domain 1 is unstructured) (**Fig. 1a**).<sup>38,39</sup> Second, sigma-70 is responsible for recruiting the  
91 core RNA polymerase complex to the promoter. The interface between RNA polymerase and sigma-70 is

92 extensive (>8000 Å<sup>2</sup>) as it spans the entire length of domains 2-4.<sup>40</sup> The third function of sigma-70 is to  
93 mediate the melting of DNA near the -10 region, which is a critical step for initiating transcription. To operate  
94 as a global regulator of cellular transcription, sigma-70 must perform each of these functions with high  
95 efficiency and fidelity.

96

97 To engineer orthogonal sigma variants, we must alter promoter specificity while preserving interactions with  
98 the core RNA polymerase complex and those required for DNA melting. Therefore, we aimed to restrict the  
99 design to key residues of the helix-turn-helix motif of domain 4 to alter promoter specificity through the -35  
100 DNA element. These include residues R584, E585, R586, R588, and Q589 (**Fig. 1a, box**). In the structure  
101 of the *E. coli* transcription initiation complex (PDB ID: 4YLN), the positively charged R586 and R588 form  
102 polar interactions with the negatively charged phosphate backbone to likely promote general DNA affinity.<sup>39</sup>  
103 Specific interactions with the nucleotide bases are formed between R584:Gua-31\* and E585:Ade-34\* in  
104 the major groove of the -35 element. Although oriented towards the major groove, Q589 does not directly  
105 interact with the -35 element. Instead, Q589 is sterically packed between residues E585, R586 and R588  
106 and, likely plays a role in properly orienting these critical residues within the recognition helix. Given their  
107 structural roles, we hypothesized that redesigning these five key positions could engineer orthogonal  
108 promoter specificity of sigma-70.

109

110 Our design workflow begins with identifying -35 element mutants that are not recognized by wildtype sigma-  
111 70. These mutants became recognition targets for the computational redesign of the major groove helix  
112 residues of wildtype sigma-70 (**Fig. 1b**). The top 1000 ranked designs were synthesized as chip-based  
113 oligonucleotide library and evaluated in pooled fashion using a cell-based GFP screen. In this assay, high  
114 GFP fluorescence signifies a specificity switch of sigma-70, as the variant must recognize the orthogonal -  
115 35 element to initiate transcription of GFP. To identify specificity switches from the pooled screen, we  
116 compared the distribution of variants between sorted and presorted states by deep sequencing (**Fig. 1c**).  
117 Clonal screens were then used to validate several successful redesigns for each targeted -35 element.

118

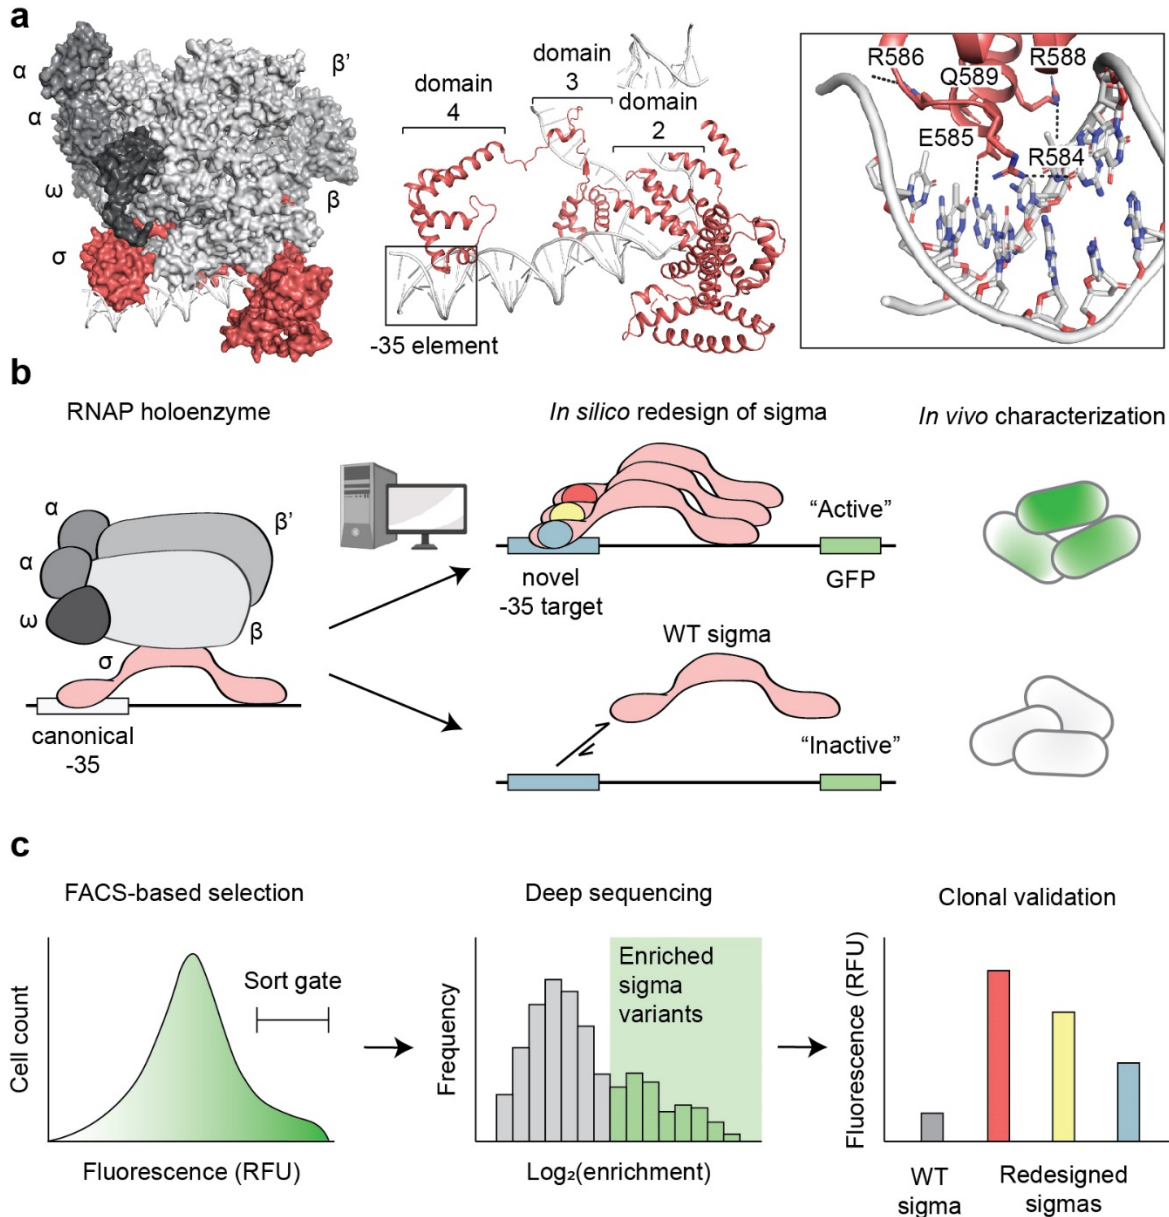

119

120 **Fig. 1. Engineering sigma-70 variants with novel promoter specificity.** (a), Structure of the *E. coli*  
 121 transcription initiation complex (PDB ID: 4YLN). sigma-70 (red) bound to the -10 and -35 DNA elements  
 122 (gray, cartoon representation) and RNAP core complex (gray, surface representation), composed of  $\alpha$  (two  
 123 copies),  $\beta$ ,  $\beta'$ , and  $\omega$  subunits (left). Canonical -35 element recognized by the helix-turn-helix motif of sigma-  
 124 70 domain 4 and -10 element recognized by domains 2 and 3 (middle). Orientation and h-bond contacts of  
 125 residues R584, E585, R586, R588, and Q589 of the domain 4 recognition helix in the -35 major groove  
 126 (right). (b), Workflow for altering sigma-70 promoter specificity *in silico* and characterizing function *in vivo*.  
 127 Cartoon schematic of the RNAP holoenzyme with WT sigma-70 bound to the canonical -35 element (left).  
 128 Replacement of the canonical -35 with a novel target and computational redesign of the domain 4  
 129 recognition helix to engineer sigma-70 variants with orthogonal promoter specificities (middle). *In vivo*  
 130 functional characterization using a GFP gene placed downstream of the promoter variants containing novel  
 131 -35 targets (right). (c), Platform for high-throughput selection and characterization of redesigned sigma-70  
 132 variants. FACS to isolate GFP positive (i.e., functional variants) (left), deep sequencing to identify enriched  
 133 variants (middle), and clonal testing of redesigned sigma-70s to validate function (right).

134

### 135 **Synthetic promoter modifications enhance sigma-70 dependence on the -35 element**

136 As mentioned above, sigma-70 utilizes a two target DNA recognition system, with domain 4 recognizing  
137 the canonical -35 element, and domains 2 and 3 recognizing the canonical -10 element. Due to this two-  
138 target dependence, engineering an orthogonal sigma factor would require the redesign of multiple sigma-  
139 70 DNA binding domains and their respective consensus DNA sequences. However, by artificially  
140 increasing dependence of DNA recognition on the -35 DNA element, redesign is simplified to a one domain-  
141 one target problem. There are several advantages to engineering orthogonality through the -35 element  
142 rather than the -10 element: (1) -35 recognition is mediated by a single domain of sigma-70, (2) interactions  
143 between the helix-turn-helix motif of domain 4 with the -35 major groove are structurally well understood,  
144 and (3) interactions between sigma-70 and the -10 element are much more complex as transcription  
145 initiation is mediated by DNA melting near this region. Thus, we sought to increase sigma-70's dependence  
146 on the -35 element, and then engineer sigma-70 variants that recognize orthogonal -35 targets.

147

148 We first placed a gene encoding GFP downstream of a strong constitutive *E. coli* promoter with canonical  
149 -35 'TTGACA' and -10 'TATAAT' sequences (apFab71)<sup>41</sup> on a "reporter plasmid" to use fluorescence as a  
150 measure of transcriptional activity. As expected, a negative control lacking both canonical -10 and -35  
151 promoter elements resulted in very low fluorescence relative to the apFab71 promoter (**Fig. 1a**). We  
152 generated a randomized (NNNNNN) library of the -35 sequence to assess the dependence on the -10 site.  
153 Moderate fluorescence was observed in the population of cells expressing the randomized -35 library,  
154 suggesting that the canonical -10 element alone is partially sufficient to recruit sigma-70. To attenuate the  
155 -10 dependence and increase the -35 dependence, we aimed to identify a promoter variant with high  
156 transcriptional activity with the canonical -35 sequence, but significantly lower activity when paired with a  
157 disrupted -10 sequence. To this end, we characterized a small subset of nucleotide deletion variants ( $\Delta(-$   
158 11),  $\Delta(-16,-7)$ ,  $\Delta(-8)$ ,  $\Delta(-7)$ ) near the -10 region of apFab71. The  $\Delta$  denotes deletion of a nucleotide at a  
159 specific site within the -10 site. We quantified the -35 dependence of each -10 deletion variant by comparing  
160 the fluorescence ratio of the deletion variant with a clonal canonical -35 and the randomized -35 population.  
161 As desired, all four apFab71 promoter variants retained -35 dependence (i.e., lower fluorescence in the

162 randomized condition) and displayed approximately a 10-fold reduction in fluorescence relative to the native  
163 apFab71 promoter with a randomized -35 sequence (**Fig. 2a**). The  $\Delta(-7)$  promoter exhibited the greatest -  
164 35 dependence with a 330-fold difference in fluorescence between the canonical and randomized -35  
165 sequences. Thus, the  $\Delta(-7)$  promoter was selected as the starting construct for redesigning the promoter  
166 specificity of sigma-70.

167

### 168 **Endogenous *E. coli* sigma-70 displays very weak activity on selected -35 targets**

169 We next sought to identify a set of five promoter targets orthogonal to the canonical -35 element recognized  
170 by endogenous *E. coli* sigma-70. From the library of randomized -35 sequences of the apFab71  $\Delta(-7)$   
171 promoter, we used a high-throughput 96-well screening approach to isolate and characterize promoter  
172 variants not recognized by native sigma-70. We isolated 74 unique -35 variants with a 500-fold weaker  
173 sigma-70 transcriptional activity (GFP fluorescence  $<10^3$  RFU) relative to apFab71 (**Supplementary Table**  
174 **1**). Comparing the sequences of these low activity -35 variants did not reveal a strong pattern suggesting  
175 that there are many unique ways to disrupt sigma-70 promoter recognition (**Fig. 2c**). Weak conservation  
176 was observed at Cyt-31 of the canonical -35 (TTGACA), but other positions deviated from the canonical  
177 sequence which is also reflected by their median Hamming distance of 5 (**Supplementary Table 1**). From  
178 these low activity -35 variants, we selected five diverse target sequences for engineering sigma-70 variants  
179 with novel specificities: TTCATC, GGAACC, CCGCCG, GCTACC, and CCCCTC. These promoter targets  
180 all displayed low transcriptional activity (500- to 900-fold lower fluorescence than apFab71), comparable to  
181 the no promoter control, and vary in their composition and Hamming distances from the canonical -35  
182 sequence (**Fig. 2d**). Due to their diversity, we hypothesized that these five -35 sequences present would  
183 present unique design challenges and demonstrate the breadth of our redesign capabilities.

184



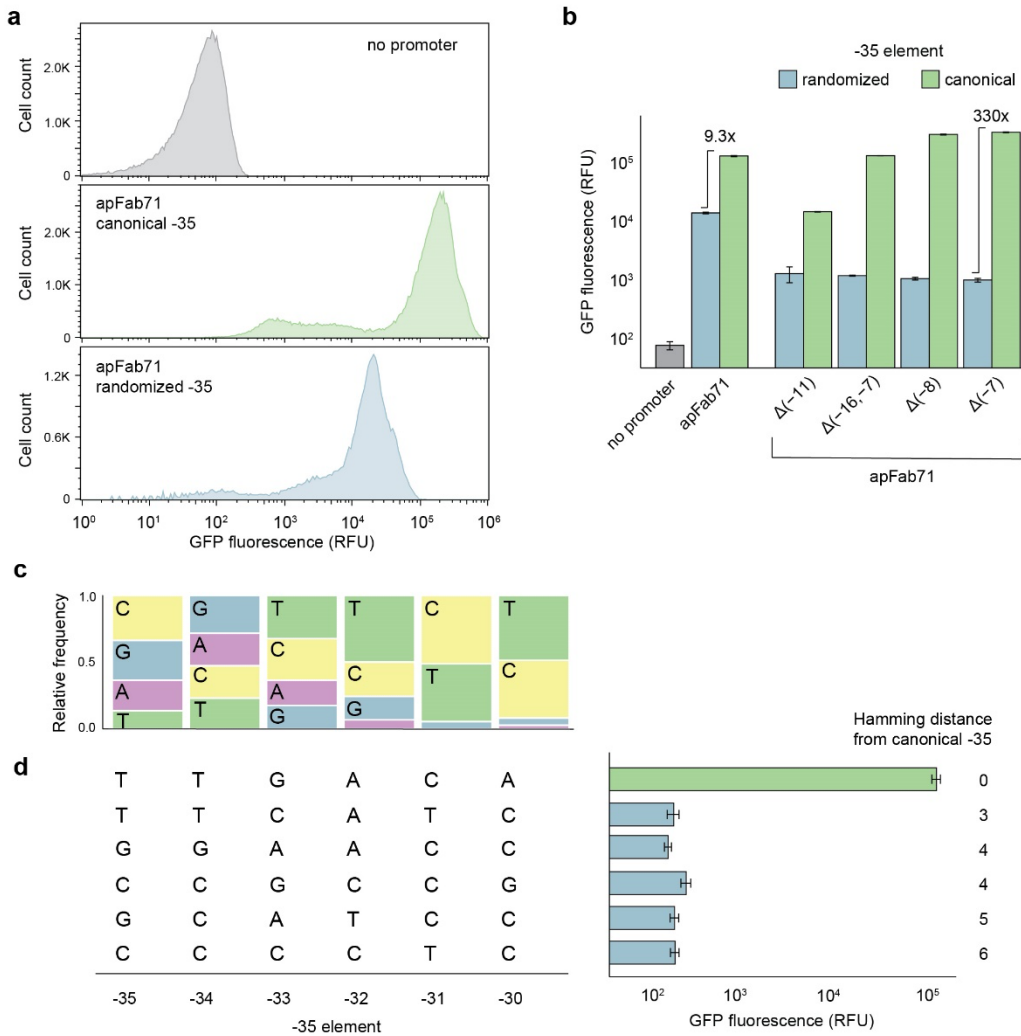

185

186 **Fig. 2. Sigma-70 dependence on the -35 element and selection of orthogonal promoter targets.** (a),  
 187 Fluorescence distributions of *E. coli* cells expressing native sigma-70 and containing plasmid constructs  
 188 with a GFP gene placed downstream of no promoter (gray), the strong constitutive apFab71 promoter  
 189 (green), or the apFab71 promoter with a randomized -35 element (blue). (b), Median flow cytometry  
 190 measured fluorescence of promoter variants containing nucleotide deletions ( $\Delta$ ) near the -10 region, and  
 191 either a canonical or randomized -35 element. Fold-change between canonical and randomized -35 states  
 192 was used to evaluate -35 transcriptional dependence. (c), Sequence logos (-35 region) of 74 unique clonal  
 193 isolates with low GFP fluorescence ( $<10^3$  RFU) (**Supplementary Table 1**). Clones were screened in 96-  
 194 well format from the apFab71  $\Delta(-7)$  randomized -35 library. (d), Selected -35 DNA targets for engineering  
 195 orthogonal sigma-70 variants. Nucleotide sequences (left) and median fluorescence (right) using native  
 196 sigma-70. Error bars denote the standard deviation of replicate flow cytometry experiments ( $n \geq 2$ ). RFU,  
 197 relative fluorescence units. OD, optical density measured at 600nm.  
 198

199 **Rosetta calculations reveal the sigma-70 sequence preferences for each promoter target**

200 To engineer sigma-70 variants that recognize each of the five -35 targets (TTCATC, GGAACC, CCGCCG,

201 GCTACC, and CCCCTC), we first performed large-scale combinatorial mutagenesis of residues R584,

202 E585, R586, R588, and Q589 in the helix-turn-helix (HTH) motif of domain 4 using the Rosetta  
203 macromolecular modeling suite.<sup>42-44</sup> We excluded I587 because it is located along the interface of the HTH  
204 and makes no DNA contacts. The design workflow is as follows. We replace the canonical -35 sequence  
205 (TTGACA) of the sigma-70:DNA co-crystal structure (PDB: 4YLN, **Fig. 1a**) with a target -35 sequence that  
206 we experimentally validated was unable to initiate transcription using native sigma-70 (**Fig. 1b**). Then, we  
207 perform an *in silico* scan to evaluate the stability of the protein-DNA complex for all possible single, double,  
208 triple, and quadruple variants (total ~724,000 sigma-70 variants) of the sigma-70 recognition helix (Fig. 1a,  
209 boxed, middle panel). Calculations for all ~724,000 sigma-70 variants against the five target -35 elements  
210 were performed on a high-throughput computing (HTC) system, requiring approximately 400,000  
211 computing hours (2-3 weeks real-time). Computed protein:DNA interface scores for the ~724,000 sigma  
212 variants in complex with the promoter targets were used to curate designs for experimental testing (**Fig.**  
213 **3a, Supplementary Fig. 1a**). Lower interface scores indicate a more stable complex. Interestingly,  
214 differences between median interface scores among sigma-70 variants revealed a hierarchy of promoter  
215 preference of the sigma-70 scaffold (TTGACA < TTCATC < GGAACC < CCGCCG < GCATCC < CCCCTC)  
216 with interface scores decreasing with increasing Hamming distance from the consensus -35 sequence,  
217 TTGACA.

218

219 This suggests a smooth binding landscape of sigma-70 DNA recognition where incremental mutations from  
220 the canonical -35 sequence decrease binding strength. To assess sigma-70 sequence preferences with  
221 each promoter, we computed position-specific amino acid enrichment scores ( $E_{\text{score}}$ ) for the top 1000  
222 scoring interfaces (**Fig. 3b, Supplementary Fig. 1b**). We observed that substitutions at positions 584 and  
223 589 did not have an impact on the protein-DNA interface scores suggesting that these are indirect contacts  
224 that likely do not drive affinity. Nonetheless, the most enriched residue at both positions was not the wildtype  
225 amino acid and was distinct for each promoter site. This suggests that though these may be indirect  
226 contacts, they could play a role in promoter specificity. In contrast, positions 585, 586 and 588 show subtle,  
227 but distinct preferences for different binding sites. Enrichment heat maps indicate sigma-70 positions 585,  
228 586, and 588 undergo stringent selection across all -35 targets. These positions directly contact DNA in the  
229 crystal structure of native sigma-70 in complex with the canonical (TTGACA) -35 element (**Fig.1a**). As

230 expected, positively charged and/or large hydrophobic amino acids are generally preferred at these  
231 positions, which can facilitate highly favorable hydrogen bonding, electrostatic and/or van der Waals  
232 interactions with the DNA. For all promoters, arginine and tyrosine were the most enriched amino acids at  
233 positions 586 and 588, respectively. Both residues make non-specific hydrogen bonds with the sugar-  
234 phosphate backbone of DNA (**Fig. 3c, Supplementary Fig. 1c**). Clear differences in amino acid preference  
235 were evident for position 585. For the -35 target TTCATC, arginine was the most enriched amino acid,  
236 which forms two hydrogen bonds with Gua-35\* in the Rosetta structural models. Similarly, a single hydrogen  
237 bond is formed by tryptophan at position 585 with Gua-35\* or Thy-35\* for promoters CCCCTC and  
238 GCATCC, respectively. In contrast, bulky hydrophobic residues phenylalanine and leucine make van der  
239 Waals contacts with the CCGCCG and GGAACC promoters. Because positions 584 and 589 do not directly  
240 interact DNA, substitutions at these positions had less distinct effects on the Rosetta computed interface  
241 scores.

242

243 The redesigned sigma-70 variants were ranked by binding energy, and the highest affinity 1000 variants  
244 for each target -35 element were selected for experimental testing. In addition, for targets TTCATC,  
245 GGAACC, and CCGCCG, we selected 1000 variants with binding energies comparable to native sigma-70  
246 and the canonical -35 element (-26.0 REU), as this affinity may be optimal for DNA recognition and promoter  
247 release during transcription initiation. For GCATCC and CCCCTC, the “highest affinity” and “WT-like” sets  
248 were identical because the binding energy distributions of these targets were less favorable (**Fig. 3a**). We  
249 synthesized these variant libraries on an IPTG-inducible plasmid expression system using oligonucleotide  
250 chip synthesis and one-pot cloning.

251

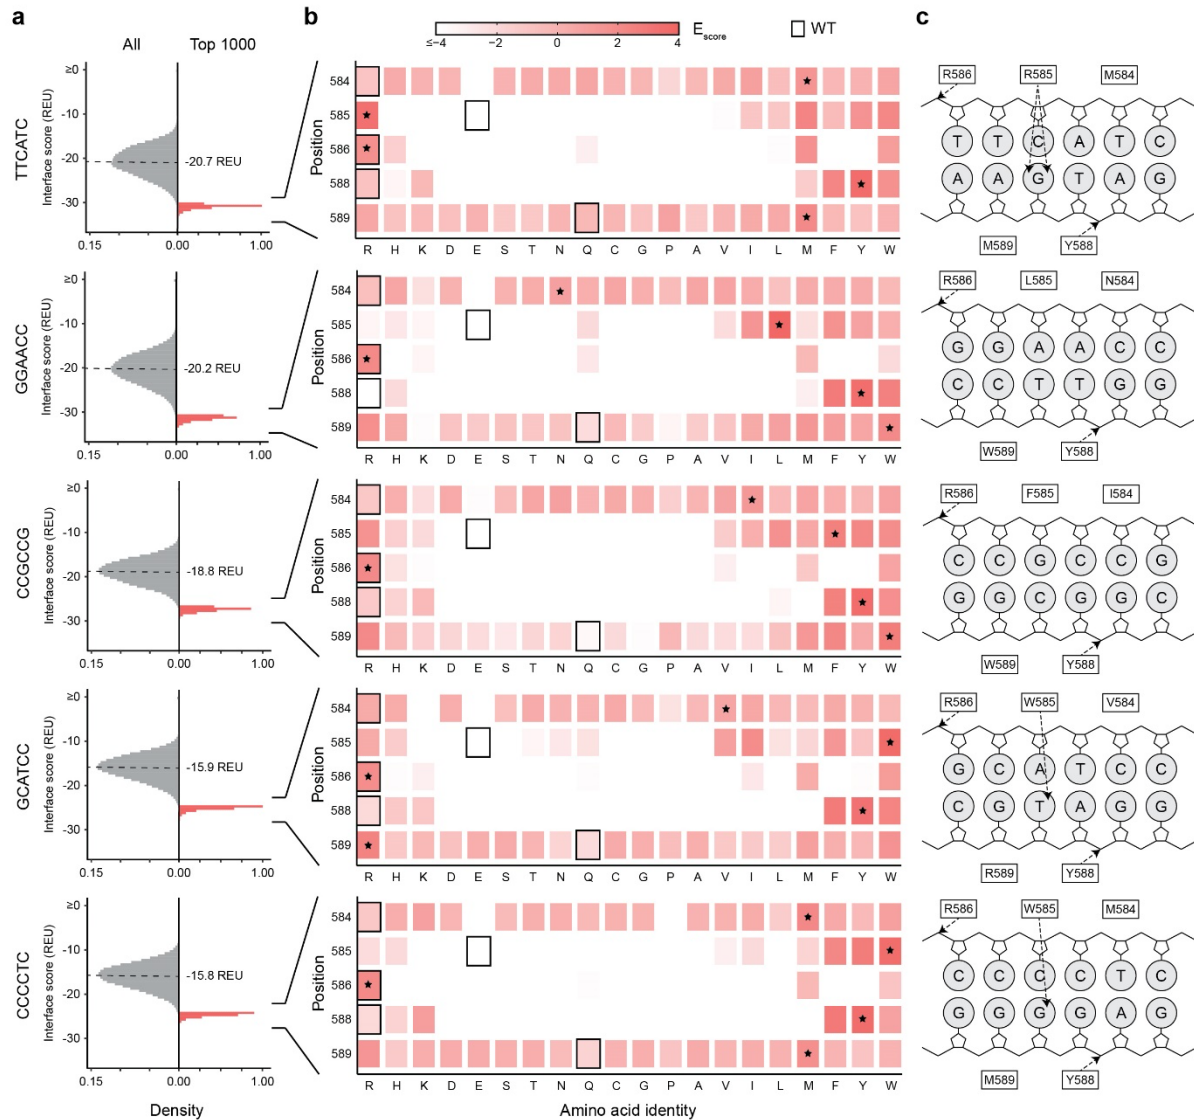

252

253 **Fig. 3. Rosetta guided design of sigma-70 variants for each promoter target.** (a), Interface scores of  
 254 all (gray) or 1000 top scoring (red) sigma-70 variants in complex with each -35 DNA target. Dashed lines  
 255 indicate the median interface scores of all single, double, triple, and quadruple combinatorial variants of  
 256 sigma-70 positions 584, 585, 586, 588, and 589 modeled with Rosetta. (b), Position-specific amino acid  
 257 enrichment scores (red gradient) among selected top scoring sigma-70 variants. WT identity (boxed outline)  
 258 and most enriched amino acid (\*) at each mutable position. (c), Cartoon schematic showing H-bonds  
 259 formed between each enriched sigma-70 consensus sequence and -35 DNA target in the Rosetta structural  
 260 models.  
 261

### 262 Isolation and identification of sigma-70 variants with novel promoter specificities

263 To synthesize the computationally curated library of sigma-70 designs for each promoter target, we used  
 264 chip-based oligonucleotides and one-pot cloning. The library of sigma-70 designs for each target was  
 265 independently cloned into an expression plasmid and placed under IPTG control. Each library was

266 transformed into *E. coli* harboring their cognate reporter plasmid i.e., GFP gene placed downstream of the  
267 respective target -35 element. Due to the “housekeeping” role of sigma-70, overexpression of a sigma-70  
268 variant can competitively sequester the RNAP core enzyme to inhibit cell viability. This toxicity challenge  
269 has been reported in previous works using heterologous sigmas and domain swaps.<sup>33-35</sup> To identify an  
270 expression level with minimal toxicity, we first varied the IPTG inducer concentration in a clonal growth  
271 assay. Minimal growth deficiency was observed using 5 $\mu$ M IPTG, and thus, this concentration was used  
272 for all subsequent experiments (**Supplementary Fig. 2**).

273

274 To isolate and enrich high activity sigma-70 redesigns, we sorted the high fluorescence subpopulation of  
275 each library in the IPTG induced condition. Comparison of the fluorescence distributions of cell populations  
276 in the induced and uninduced states show distinctly higher fluorescence in the induced condition for all five  
277 target promoters (**Fig. 4a, Supplementary Figs. 3,4a**). This suggested that some sigma-70 redesigns may  
278 indeed be able to successfully transcribe from an orthogonal -35 sequence. The presorted and sorted  
279 libraries were deep sequenced to identify sigma-70 redesigns that were enriched after selection.  
280 Approximately 10-15% of all sigma-70 variants within each 1000-member library were enriched (**Fig. 4b,**  
281 **Supplementary Fig. 4b**). Taken together, these results validate our *in silico* redesign approach and high-  
282 throughput screening platform.

283

#### 284 **Sequence profiles of redesigned sigma-70 variants are unique to each -35 target**

285 Following deep sequencing, we evaluated the sigma-70 sequence profiles among enriched library variants  
286 of each -35 target. Given that the 5 promoter targets are separated by a median Hamming distance of 4,  
287 we expected the variable positions of sigma to undergo unique sequence selection (i.e., position-specific  
288 amino acid enrichment) to recognize each -35 target (**Supplementary Fig. 5**). While some similarities are  
289 shared across the sequence profiles for the five targets, each consensus sequence is unique (**Fig. 4c,**  
290 **Supplementary Fig. 4c**). Arginine was highly enriched at position 586, whereas both tyrosine and arginine  
291 were enriched at position 588 for all targets. In the WT sigma-70:DNA co-crystal structure (PDB: 4YLN)  
292 and Rosetta structural models, positions 586 and 588 interact primarily with the sugar-phosphate backbone  
293 of DNA (**Fig. 3c**). Thus, the enrichment of charged and/or polar residues at these positions is consistent

294 with forming favorable non-specific DNA interactions. These structures also show base-specific interactions  
295 facilitated by position 585, which is where we observe several differences in enrichment across the  
296 promoter targets: arginine is favored by targets TTCATC and CCGCCG, bulky hydrophobic residues (I, F,  
297 and L) by GGAACC, aromatic residues (W, Y, and F) by CCCCTC and a wider range of residue types (W,  
298 R, I, and F) by GCATCC (**Fig. 4c**). Selection was less stringent at positions 584 and 589 of sigma-70 for  
299 all targets, as a broad range of amino acid identities were found among enriched variants. These positions  
300 often do not directly interact with the promoter in the Rosetta models. However, charged residues (R and  
301 H) were more enriched at positions 584 and 589 by targets GGAACC and GCATCC, which may  
302 electrostatically enhance DNA affinity. Additional interactions may be required to facilitate binding because  
303 the interactions by position 585 with the respective -35 targets are less specific. These results demonstrate  
304 that promoter specificity of sigma-70 is dictated by compounding differences in primary sequence that  
305 modulate both base-specific and general DNA affinity interactions.  
306

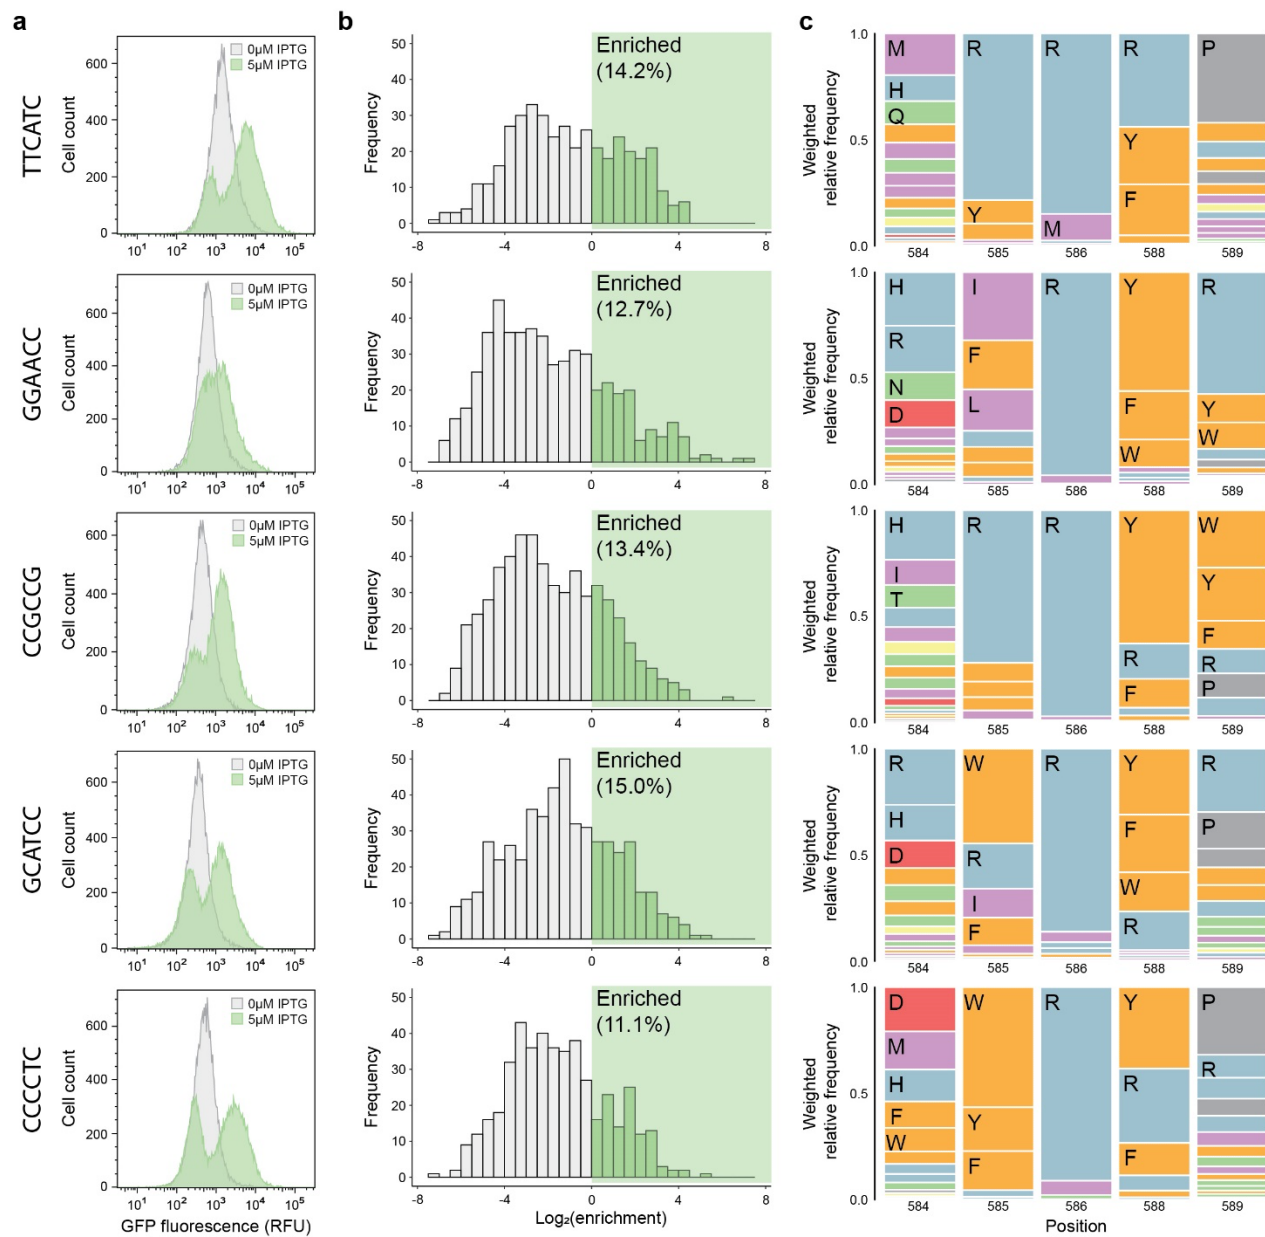

307

308 **Fig. 4. Selection and identification of successfully redesigned sigma-70 variants.** (a), Flow cytometry  
 309 fluorescence distributions of uninduced (gray) and IPTG induced (green) sigma-70 variant populations for  
 310 each -35 target after FACS-based selection of functional redesigns. Transcriptionally active variants were  
 311 enriched using two rounds of sequential GFP positive cell sorting. (b), Distributions of log-transformed  
 312 enrichment scores of all characterized sigma-70 variants after selection. Deep sequencing was performed  
 313 on the presorted and sorted libraries to compute enrichment ratios. (c), Sequence logos showing the  
 314 weighted amino acid frequencies at each mutable position among functionally enriched sigma-70 variants.  
 315 Amino acid identities are colored by chemical properties: polar amino acids (N, Q, S, T) shown in green,  
 316 basic (H, K, R) blue, acidic (D, E) red, hydrophobic (A, I, L, M, V) purple, aromatic (F, W, Y) orange, and  
 317 other (C, G, P) gray.  
 318

319

## 320 **Redesigned sigma-70's exhibit varying levels of activity on the promoter targets**

321 To validate the results of our high-throughput screen, we evaluated the activity of clonal isolates from our  
322 redesigned sigma-70 libraries. A total of 96 clones from the sorted libraries were randomly sampled, and  
323 from this set, we were able to identify redesigned sigma-70s with activity on each of the five promoter  
324 targets (**Fig. 5a, Supplementary Table 2**). To assess the performance of each sigma variant, we first  
325 measured the fluorescence of cells containing the target promoters upstream of GFP in the presence of  
326 endogenous WT sigma-70. Under this condition, the promoter variants yielded low fluorescence ( $<400$  RFU  
327  $OD^{-1}$ ) for the TTCATC, GGAACC, CCGCCG, GCTACC, and CCCCTC targets (**Fig. 5a**). In comparison, the  
328 activity of endogenous WT sigma-70 on the canonical -35 element (TTGACA) resulted in much higher  
329 fluorescence ( $10,200 \pm 800$  RFU  $OD^{-1}$ ) (**Supplementary Fig. 6**). Next, we measured the fluorescence of  
330 each clone on their respective -35 target sequence. Of the 96 colonies screened, 25-50% exhibited activity  
331 resulting in at least a four-fold increase in fluorescence over the endogenous WT sigma-70 baseline on the  
332 target promoter (**Supplementary Table 2**). The proportion of 'successful' redesigns in the sorted libraries  
333 is consistent with the flow cytometry profiles (**Fig. 4a**). The activities of the top three performing sigma-70  
334 redesigns for each target varied across the targets. The best performing design had 77% of the activity of  
335 endogenous WT sigma-70 on the canonical -35 element (**Fig. 5a**). For the target TTCATC, which is closest  
336 in Hamming distance to the canonical -35 sequence (**Fig. 2d**), we found the three highest performing  
337 redesigned sigma-70s (CRRVY, FIQRY, and FWCRY). However, performance does not scale with  
338 Hamming distance, suggesting a more complex relationship exists between a given -35 target and the  
339 success of computationally redesigned sigma-70s.

340

## 341 **Rosetta structural models reveal potential mechanisms of -35 target recognition**

342 In addition to the low transcriptional activation by WT sigma-70, the five -35 targets were selected due to  
343 their sequence deviation (i.e. orthogonality) from the canonical -35 and each other. The utility of engineered  
344 sigma factors is dependent on minimizing crosstalk between various sigma factor-target pairs. By targeting  
345 diverse -35 sequences with our redesign of sigma-70, we sought to generate novel and specific protein-  
346 DNA interactions for each sigma factor-target pair. Evaluating Rosetta structural models generated for the  
347 highest performing sigma-70 redesigns, we observe several differences between the hydrogen bonding



348 patterns of our redesigned sigma-70 variants with their cognate -35 targets (**Fig. 5b**). Some interactions  
349 were largely conserved across target sequences, such as the h-bonds between residues 586 and 588 of  
350 sigma and the sugar-phosphate backbone of nucleotides -35 and -\*31, despite the diverse polar and  
351 charged residues employed to maintain these interactions. In contrast to the other -35 targets, the hydrogen  
352 bonding patterns of the top three performing sigma-70 redesigns for targets CCGCCG and CCCCTC are  
353 highly converged. The base-specific interactions between CCGCCG and variants IRRYY, HRRYY, and  
354 CRRYY occur between R585:Gua-33 and Y589:Gua-34\*. For CCCCTC, a single base-specific interaction,  
355 W585:Gua-33\*, appears sufficient for recognition by sigma-70 variants CWRRP, FWRRP, and MWMRP,  
356 perhaps necessitating the additional non-specific h-bond between R586 and the sugar-phosphate  
357 backbone. However, the number of h-bonds present in these protein-DNA structural models ranges from  
358 one to four, which highlights the importance of other types of molecular interactions (van der Waal's, dipole-  
359 dipole) for promoter recognition. Though computationally derived, these models show how unique sets of  
360 interactions may facilitate -35 target recognition by our successfully redesigned sigma-70 variants.

361

362 To understand the relationship between the Rosetta interface scores and the performance of each sigma-  
363 70 redesign, we compared these energies to the enrichment scores from our high-throughput screen (**Fig.**  
364 **5c**). While the computational screening approach was successful at generating functional variants and  
365 significantly reduced the sequence space search from 3.2 million ( $20^5$ ) combinations to a manageable  
366 1000-member test set, the highest affinity redesigns (i.e. lowest interface scores) were not among the best  
367 performing. This underscores the necessity of our high-throughput screening platform using FACS and  
368 deep sequencing to isolate functional redesigns. The top three performing sigma-70 variants for each -35  
369 target had Rosetta interface scores comparable to that of WT sigma-70 on the canonical -35 element (-  
370 26.0 REU), suggesting that an 'optimal binding affinity' exists for DNA recognition and transcription initiation  
371 by sigma-70. An optimized affinity may facilitate proper association with the promoter and allow dissociation  
372 of sigma-70 to initiate transcription and elongation.

373

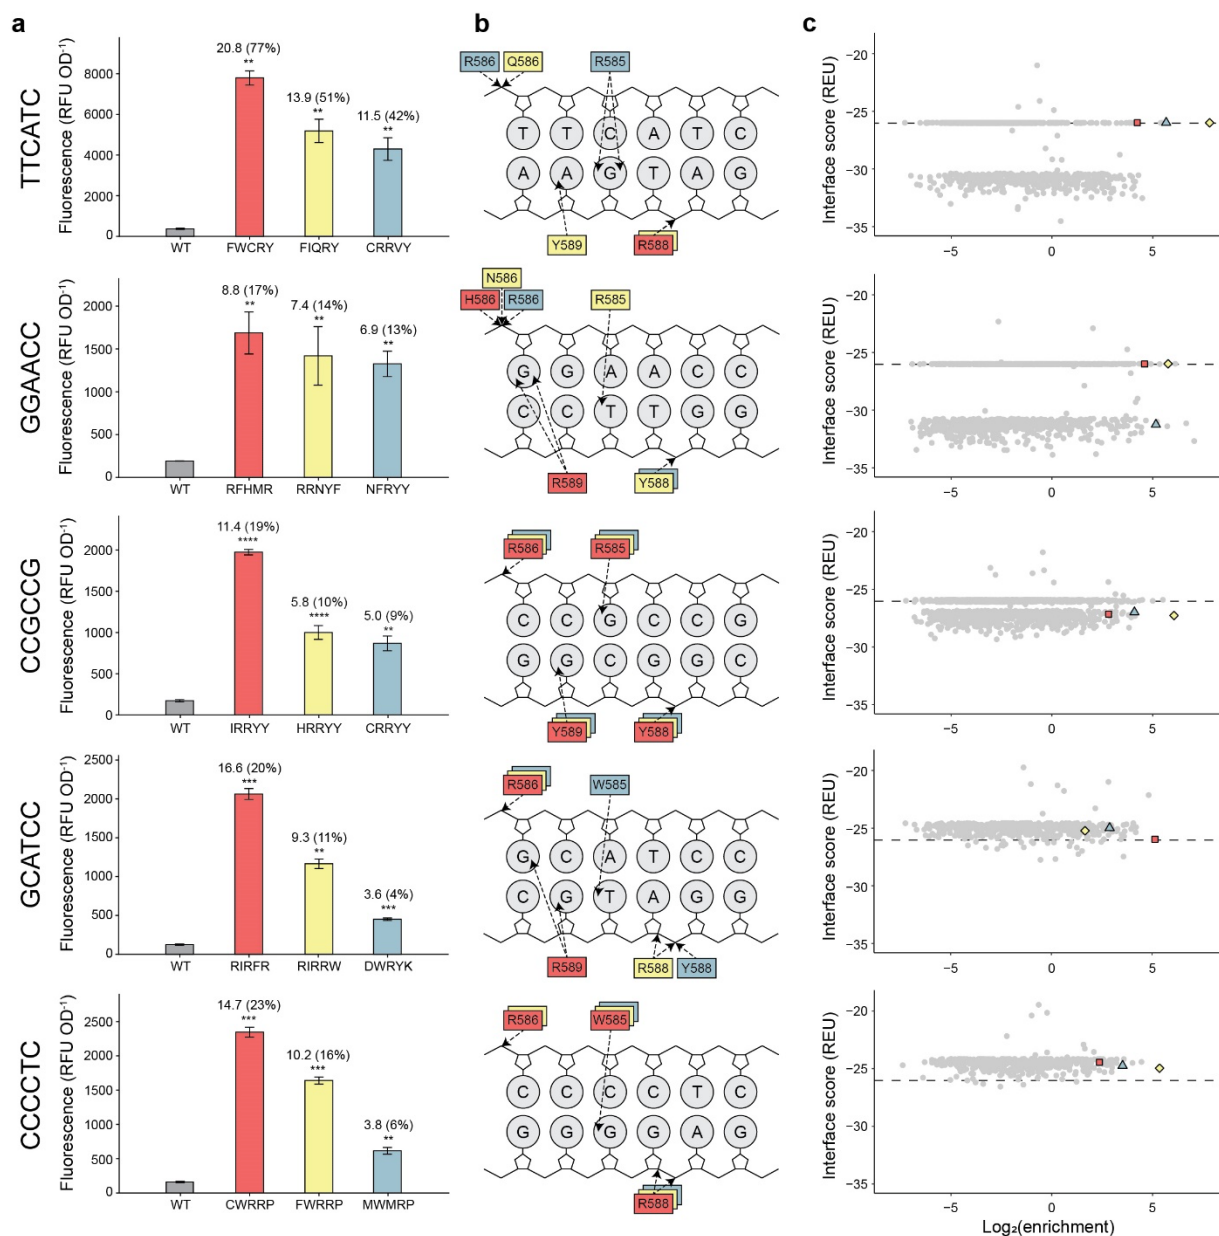

374

375 **Fig. 5. Clonal validation of redesigned sigma-70 variants.** (a), Normalized fluorescence of WT sigma-  
 376 70 (gray) and the top three performing variants (red, yellow, or blue) for each promoter target. Clones were  
 377 selected from the sorted libraries and assayed in a 96-well fluorescence plate reader. Error bars denote the  
 378 standard deviation (\*\*P ≤ 0.01, \*\*\*P ≤ 0.001) of replicates (n≥3) and computed fold-changes are relative  
 379 to the fluorescence resulting from endogenous WT sigma-70 with each target. Percentages of activity are  
 380 relative to the activity of endogenous WT sigma-70 with the promoter containing a canonical -35 element  
 381 (**Supplementary Fig. 6**). RFU, relative fluorescence units. OD, optical density at 600nm. (b), Cartoon  
 382 schematic showing H-bonds formed between each sigma-70 variant and the cognate -35 DNA target in the  
 383 Rosetta structural models. (c), Rosetta interface scores and enrichment scores from the high-throughput  
 384 screen of all tested sigma-70 variants. The top three performing variants are indicated in red (square),  
 385 yellow (circle), and blue (triangle).  
 386

387

## 388 DISCUSSION

389 We devised a high throughput *in silico* modeling and *in vivo* screening workflow to redesign promoter  
390 specificity of the *E. coli* “housekeeping” regulator of transcription, sigma-70. Using this workflow, we  
391 identified multiple sigma-70 variants that activate transcription on 5 target promoters containing diverse -  
392 35 elements: TTCATC, GGAACC, CCGCCG, GCTACC, and CCCCTC. These results demonstrate that the  
393 promoter specificity of an essential primary transcription regulator can be rationally redesigned. Although  
394 the process of transcription initiation (i.e. promoter recognition and DNA melting) by sigma factors is  
395 complex, the partitioned functional domains of sigma factors enabled key interactions between the domain  
396 4 recognition helix and the -35 DNA element to be redesigned without perturbing other functions. Our  
397 success across all five target sequences demonstrates the extent at which promoter specificity can be  
398 altered and the generalizability of our approach. Given that the Hamming distance separation ranges from  
399 three to six (of 6 nucleotide positions) between these novel -35 elements and the canonical -35 element,  
400 TTGACA, our approach also enables the design of sigma factors with maximal orthogonality from natural  
401 sigma factors and thereby, greater potential to minimize crosstalk between synthetic and host expression  
402 systems. In contrast, sigma factors generated in previous works using domain swaps of alternative sigma  
403 factors or introduced from non-host family bacteria, have been limited in their orthogonality and host  
404 compatibility.

405

406 One advantage to the engineered sigma-70 variants presented is that they integrate seamlessly into the *E.*  
407 *coli* host, as they utilize the same endogenous transcriptional machinery. While the level of activation varied  
408 from 3-fold to 20-fold across our top performing redesigns, we show that this activity was also engineered  
409 *de novo*, as the native sigma-70 exhibited little to no activity on each of the orthogonal promoters. Using  
410 structural models of these successful redesigns in complex with their cognate promoters, we observe  
411 diverse combinations of interactions that facilitate promoter recognition. This diversity extends even among  
412 successful redesigns for the same promoter target, demonstrating the utility of computational tools to  
413 navigate the energetic landscape and simplify the sequence space to be experimentally tested.

414

415 The transcription-level regulatory complexity of a cell is mediated by the concerted efforts of global and  
416 local regulators. While many existing synthetic expression systems are reliant solely on local regulators (i.e.  
417 natural or synthetic transcription factors) to control a sparse set of genes, they lack the complexity and  
418 capabilities of native systems. Only by incorporating global regulatory components, such as engineered  
419 sigma factors, can we expand the utility and complexity of synthetic genetic circuits. However, building or  
420 isolating an extensive repertoire of global regulatory components is challenging because they must be (1)  
421 orthogonal to host systems to minimize crosstalk between the synthetic and native expression networks,  
422 (2) display dynamic control by activating gene expression in response to simple input signals, and (3) be  
423 highly customizable and modular, such that they can be easily integrated into established expression  
424 systems. Here, we developed and validated a generalizable approach to engineer sigma-70 variants that  
425 satisfy all these requirements and can be similarly applied to any host sigma factor to expand the set of  
426 available global regulatory components. Future work could pair these engineered sigma-70 factors with  
427 existing local regulators of transcription in a biosynthetic expression system.

428

429

430

431 **ACKNOWLEDGEMENTS**

432 This work was partly supported by the NIH Director's New Innovator's Award (DP2GM132682-01 to S.R.)  
433 and partly by the Great Lakes Bioenergy Research Center, U. S. Department of Energy, Office of Science,  
434 Office of Biological and Environmental Research (Award Number DE-SC0018409). The content is solely  
435 the responsibility of the authors and does not necessarily represent the official views of the NIH, Department  
436 of Defense, Department of Energy, or other federal agencies.

437

438 **AUTHOR CONTRIBUTIONS**

439 X.L., A.T.M., T.G., and S.R. conceptualized the project. X.L. devised the cell-based screening system,  
440 cloned the promoter library, and performed sorting and NGS experiments. A.T.M. performed the *in silico*  
441 calculations and designed the sigma variant libraries. T.G. performed clonal screens and identified the top  
442 performing sigma variants for each promoter target. X.L., A.T.M., T.G, and S.R. drafted the manuscript.  
443 A.T.M., X.L., and T.G. created the figures. S.R. supervised the work. All authors edited and approved the  
444 final manuscript.

445

446 REFERENCES

- 447 1 Ceroni, F. *et al.* Burden-driven feedback control of gene expression. *Nature Methods* **15**,  
448 387-393 (2018). <https://doi.org/10.1038/nmeth.4635>
- 449 2 Gyorgy, A. *et al.* Isocost Lines Describe the Cellular Economy of Genetic Circuits.  
450 *Biophysical Journal* **109**, 639-646 (2015).  
451 <https://doi.org/10.1016/j.bpj.2015.06.034>
- 452 3 Müller, I. E. *et al.* Gene networks that compensate for crosstalk with crosstalk. *Nature*  
453 *Communications* **10**, 4028 (2019). <https://doi.org/10.1038/s41467-019-12021-y>
- 454 4 Slusarczyk, A. L., Lin, A. & Weiss, R. Foundations for the design and implementation of  
455 synthetic genetic circuits. *Nature Reviews Genetics* **13**, 406-420 (2012).  
456 <https://doi.org/10.1038/nrg3227>
- 457 5 Costello, A. & Badran, A. H. Synthetic Biological Circuits within an Orthogonal Central  
458 Dogma. *Trends in Biotechnology* **39**, 59-71 (2021).  
459 <https://doi.org/10.1016/j.tibtech.2020.05.013>
- 460 6 Browning, D. F. & Busby, S. J. W. Local and global regulation of transcription initiation in  
461 bacteria. *Nature Reviews Microbiology* **14**, 638-650 (2016).  
462 <https://doi.org/10.1038/nrmicro.2016.103>
- 463 7 Martínez-Antonio, A. & Collado-Vides, J. Identifying global regulators in transcriptional  
464 regulatory networks in bacteria. *Current Opinion in Microbiology* **6**, 482-489 (2003).  
465 <https://doi.org/10.1016/j.mib.2003.09.002>
- 466 8 Ishihama, A. & Shimada, T. Hierarchy of transcription factor network in Escherichia coli K-  
467 12: H-NS-mediated silencing and Anti-silencing by global regulators. *FEMS Microbiology*  
468 *Reviews* **45**, fuab032 (2021). <https://doi.org/10.1093/femsre/fuab032>
- 469 9 Taylor, N. D. *et al.* Engineering an allosteric transcription factor to respond to new ligands.  
470 *Nature Methods* **13**, 177-183 (2016). <https://doi.org/10.1038/nmeth.3696>
- 471 10 Rao, C. V. Expanding the synthetic biology toolbox: engineering orthogonal regulators of  
472 gene expression. *Current Opinion in Biotechnology* **23**, 689-694 (2012).  
473 <https://doi.org/10.1016/j.copbio.2011.12.015>
- 474 11 Cameron, D. E., Bashor, C. J. & Collins, J. J. A brief history of synthetic biology. *Nature*  
475 *Reviews Microbiology* **12**, 381-390 (2014). <https://doi.org/10.1038/nrmicro3239>
- 476 12 Li, J.-W., Zhang, X.-Y., Wu, H. & Bai, Y.-P. Transcription Factor Engineering for High-  
477 Throughput Strain Evolution and Organic Acid Bioproduction: A Review. *Frontiers in*  
478 *Bioengineering and Biotechnology* **8** (2020).
- 479 13 Feklistov, A., Sharon, B. D., Darst, S. A. & Gross, C. A. Bacterial Sigma Factors: A  
480 Historical, Structural, and Genomic Perspective. *Annual Review of Microbiology* **68**, 357-  
481 376 (2014). <https://doi.org/10.1146/annurev-micro-092412-155737>
- 482 14 Lu, T. K., Khalil, A. S. & Collins, J. J. Next-generation synthetic gene networks. *Nature*  
483 *Biotechnology* **27**, 1139-1150 (2009). <https://doi.org/10.1038/nbt.1591>
- 484 15 Bervoets, I. *et al.* A sigma factor toolbox for orthogonal gene expression in Escherichia  
485 coli. *Nucleic Acids Res* **46**, 2133-2144 (2018). <https://doi.org/10.1093/nar/gky010>
- 486 16 Gibson, D. G. *et al.* Complete Chemical Synthesis, Assembly, and Cloning of a  
487 *Mycoplasma genitalium* Genome. *Science* **319**, 1215-1220 (2008).  
488 <https://doi.org/10.1126/science.1151721>
- 489 17 Richardson, S. M. *et al.* Design of a synthetic yeast genome. *Science* **355**, 1040-1044  
490 (2017). <https://doi.org/10.1126/science.aaf4557>
- 491 18 Browning, D. F. & Busby, S. J. W. The regulation of bacterial transcription initiation. *Nature*  
492 *Reviews Microbiology* **2**, 57-65 (2004). <https://doi.org/10.1038/nrmicro787>
- 493 19 deHaseth Pieter, L., Zupancic Margaret, L. & Record, M. T. RNA Polymerase-Promoter  
494 Interactions: the Comings and Goings of RNA Polymerase. *Journal of Bacteriology* **180**,  
495 3019-3025 (1998). <https://doi.org/10.1128/JB.180.12.3019-3025.1998>

- 496 20 Feklistov, A. RNA polymerase: in search of promoters. *Annals of the New York Academy*  
497 *of Sciences* **1293**, 25-32 (2013). [https://doi.org:https://doi.org/10.1111/nyas.12197](https://doi.org/10.1111/nyas.12197)
- 498 21 Burgess, R. R. & Travers, A. A. Escherichia coli RNA polymerase: purification, subunit  
499 structure, and factor requirements. *Fed Proc* **29**, 1164-1169 (1970).
- 500 22 A Darst, S. Bacterial RNA polymerase. *Current Opinion in Structural Biology* **11**, 155-162  
501 (2001). [https://doi.org:https://doi.org/10.1016/S0959-440X\(00\)00185-8](https://doi.org/10.1016/S0959-440X(00)00185-8)
- 502 23 Helmann, J. D. & Chamberlin, M. J. STRUCTURE AND FUNCTION OF BACTERIAL  
503 SIGMA FACTORS. *Annual Review of Biochemistry* **57**, 839-872 (1988).  
504 [https://doi.org:10.1146/annurev.bi.57.070188.004203](https://doi.org/10.1146/annurev.bi.57.070188.004203)
- 505 24 Paget, M. S. Bacterial Sigma Factors and Anti-Sigma Factors: Structure, Function and  
506 Distribution. *Biomolecules* **5**, 1245-1265 (2015).
- 507 25 Kazmierczak Mark, J., Wiedmann, M. & Boor Kathryn, J. Alternative Sigma Factors and  
508 Their Roles in Bacterial Virulence. *Microbiology and Molecular Biology Reviews* **69**, 527-  
509 543 (2005). [https://doi.org:10.1128/MMBR.69.4.527-543.2005](https://doi.org/10.1128/MMBR.69.4.527-543.2005)
- 510 26 Gruber, T. M. & Gross, C. A. Multiple Sigma Subunits and the Partitioning of Bacterial  
511 Transcription Space. *Annual Review of Microbiology* **57**, 441-466 (2003).  
512 [https://doi.org:10.1146/annurev.micro.57.030502.090913](https://doi.org/10.1146/annurev.micro.57.030502.090913)
- 513 27 Lonetto, M., Gribskov, M. & Gross, C. A. The sigma 70 family: sequence conservation and  
514 evolutionary relationships. *J Bacteriol* **174**, 3843-3849 (1992).  
515 [https://doi.org:10.1128/jb.174.12.3843-3849.1992](https://doi.org/10.1128/jb.174.12.3843-3849.1992)
- 516 28 Marles-Wright, J. & Lewis, R. J. Stress responses of bacteria. *Current Opinion in Structural*  
517 *Biology* **17**, 755-760 (2007). [https://doi.org:https://doi.org/10.1016/j.sbi.2007.08.004](https://doi.org/10.1016/j.sbi.2007.08.004)
- 518 29 Helmann, J. D. The extracytoplasmic function (ECF) sigma factors. *Adv Microb Physiol*  
519 **46**, 47-110 (2002). [https://doi.org:10.1016/s0065-2911\(02\)46002-x](https://doi.org/10.1016/s0065-2911(02)46002-x)
- 520 30 Maeda, H., Fujita, N. & Ishihama, A. Competition among seven Escherichia coli  $\sigma$   
521 subunits: relative binding affinities to the core RNA polymerase. *Nucleic Acids Research*  
522 **28**, 3497-3503 (2000). [https://doi.org:10.1093/nar/28.18.3497](https://doi.org/10.1093/nar/28.18.3497)
- 523 31 Cowing, D. W. & Gross, C. A. Interaction of Escherichia coli RNA polymerase holoenzyme  
524 containing  $\sigma_{32}$  with heat shock promoters: DNase I footprinting and methylation  
525 protection. *Journal of Molecular Biology* **210**, 513-520 (1989).  
526 [https://doi.org:https://doi.org/10.1016/0022-2836\(89\)90127-7](https://doi.org/10.1016/0022-2836(89)90127-7)
- 527 32 Koo, B. M., Rhodius, V. A., Nonaka, G., deHaseh, P. L. & Gross, C. A. Reduced capacity  
528 of alternative sigmas to melt promoters ensures stringent promoter recognition. *Genes*  
529 *Dev* **23**, 2426-2436 (2009). [https://doi.org:10.1101/gad.1843709](https://doi.org/10.1101/gad.1843709)
- 530 33 Rhodius, V. A. *et al.* Design of orthogonal genetic switches based on a crosstalk map of  
531  $\sigma_s$ , anti- $\sigma_s$ , and promoters. *Mol Syst Biol* **9**, 702 (2013).  
532 [https://doi.org:10.1038/msb.2013.58](https://doi.org/10.1038/msb.2013.58)
- 533 34 Gaida, S. M. *et al.* Expression of heterologous sigma factors enables functional screening  
534 of metagenomic and heterologous genomic libraries. *Nature Communications* **6**, 7045  
535 (2015). [https://doi.org:10.1038/ncomms8045](https://doi.org/10.1038/ncomms8045)
- 536 35 Bervoets, I. *et al.* A sigma factor toolbox for orthogonal gene expression in Escherichia  
537 coli. *Nucleic Acids Research* **46**, 2133-2144 (2018). [https://doi.org:10.1093/nar/gky010](https://doi.org/10.1093/nar/gky010)
- 538 36 Temme, K., Hill, R., Segall-Shapiro, T. H., Moser, F. & Voigt, C. A. Modular control of  
539 multiple pathways using engineered orthogonal T7 polymerases. *Nucleic Acids Res* **40**,  
540 8773-8781 (2012). [https://doi.org:10.1093/nar/gks597](https://doi.org/10.1093/nar/gks597)
- 541 37 Studier, F. W. & Moffatt, B. A. Use of bacteriophage T7 RNA polymerase to direct selective  
542 high-level expression of cloned genes. *J Mol Biol* **189**, 113-130 (1986).  
543 [https://doi.org:10.1016/0022-2836\(86\)90385-2](https://doi.org/10.1016/0022-2836(86)90385-2)
- 544 38 Barne, K. A., Bown, J. A., Busby, S. J. & Minchin, S. D. Region 2.5 of the Escherichia coli  
545 RNA polymerase sigma70 subunit is responsible for the recognition of the 'extended-10'

546 motif at promoters. *Embo j* **16**, 4034-4040 (1997).  
547 <https://doi.org/10.1093/emboj/16.13.4034>

548 39 Zuo, Y. & Steitz, Thomas A. Crystal Structures of the Transcription Initiation Complexes  
549 with a Complete Bubble. *Molecular Cell* **58**, 534-540 (2015).  
550 <https://doi.org/10.1016/j.molcel.2015.03.010>

551 40 Paget, M. S. B. & Helmann, J. D. The  $\sigma 70$  family of sigma factors. *Genome Biology* **4**, 203  
552 (2003). <https://doi.org/10.1186/gb-2003-4-1-203>

553 41 Mutalik, V. K. *et al.* Precise and reliable gene expression via standard transcription and  
554 translation initiation elements. *Nature Methods* **10**, 354-360 (2013).  
555 <https://doi.org/10.1038/nmeth.2404>

556 42 Thyme, S. & Baker, D. in *Homing Endonucleases: Methods and Protocols* (ed David R.  
557 Edgell) 265-282 (Humana Press, 2014).

558 43 Ashworth, J. *et al.* Computational redesign of endonuclease DNA binding and cleavage  
559 specificity. *Nature* **441**, 656-659 (2006). <https://doi.org/10.1038/nature04818>

560 44 Joyce, A. P., Zhang, C., Bradley, P. & Havranek, J. J. Structure-based modeling of protein:  
561 DNA specificity. *Brief Funct Genomics* **14**, 39-49 (2015).  
562 <https://doi.org/10.1093/bfgp/elu044>

563 45 Campbell, E. A. *et al.* Structural Mechanism for Rifampicin Inhibition of Bacterial RNA  
564 Polymerase. *Cell* **104**, 901-912 (2001). [https://doi.org/10.1016/S0092-8674\(01\)00286-0](https://doi.org/10.1016/S0092-8674(01)00286-0)

565 46 Murakami, K. S., Masuda, S., Campbell, E. A., Muzzin, O. & Darst, S. A. Structural Basis  
566 of Transcription Initiation: An RNA Polymerase Holoenzyme-DNA Complex. *Science* **296**,  
567 1285-1290 (2002). <https://doi.org/10.1126/science.1069595>

568 47 Thyme, S. & Baker, D. Redesigning the specificity of protein-DNA interactions with  
569 Rosetta. *Methods Mol Biol* **1123**, 265-282 (2014). [https://doi.org/10.1007/978-1-62703-968-0\\_17](https://doi.org/10.1007/978-1-62703-968-0_17)

570 48 Maguire, E. J., Rocca-Serra, P., Sansone, S.-A. & Chen, M. in *Eurographics Conference*  
571 *on Visualization*.  
572  
573  
574  
575



## 576 **METHODS**

### 577 **Rosetta design**

578 Rosetta design focused on *E. coli* sigma-70 positions R584, E585, R586, R588 and Q589 (PDB: 4YLN) as  
579 previous research has demonstrated that these 5 positions interact with -35 region nucleotides through  
580 hydrogen bonds.<sup>45,46</sup> Rosetta v3.9 was used for all calculations following existing Rosetta design protocol.<sup>47</sup>  
581 5 promoters bearing different -35 sequences (TTCATC, GGAACC, CCGCCG, GCTACC, and CCCCTC)  
582 were chosen after clonal testing, and were desirable due to their low transcription activity in vivo. To  
583 generate starting structures for combinatorial protein mutagenesis, each promoter sequence was first  
584 introduced in the WT sigma-70:DNA complex structure. Nucleotide substitutions were made at the  
585 canonical -35 region (WT=TTGACA).

586

587 Input structures were subjected to energy minimization using Rosetta, and lowest energy structures from  
588 50 minimizations were used as the input structure for the combinatorial protein mutagenesis scan at  
589 positions R584, E585, R586, R588, and Q589. Standard resfiles were used to denote mutations at each  
590 position for all variants containing single (95), double (3610), triple (68,590), and quadruple (651,605)  
591 combinatorial mutants. Variants containing 5 mutations (2,476,099) were not tested due to the excessive  
592 burden on computational resources. The structure of each protein variant in complex with all promoters  
593 (including WT) were generated and the Protein-DNA binding affinity was scored. The binding energy was  
594 reported as an average of 10 Rosetta minimized structures. In this minimization procedure, the amino acid  
595 substitutions were first introduced followed by side chain rotameric state optimization and protein backbone  
596 design. Lastly, the Protein-DNA interface was optimized and scored using the DNA Interface Packer mover.  
597 Out of these designs for each target promoter sequence, 1000 designs were selected based on two criteria.  
598 The first criteria sought to contain variants with the highest binding affinity for target promoter sequence,  
599 i.e. the lowest Rosetta Energy Units (REU). The second criteria sought to contain variants with a binding  
600 energy for target sequence which was closest to the observed binding energy of WT sigma-70 on its native  
601 target sequence.

602

603 The reason behind the first criterium is that low REU confers tighter binding to the target promoter  
604 sequence, which could translate into higher transcription level. On the other hand, sigma-70 amino acid  
605 composition and WT -35 sequence are likely the local minima through evolution. Although the pair's REU  
606 is not the lowest among all variants, it might indicate that there is an optimal REU to allow tight enough  
607 binding while permitting the release when RNAP moves downstream. The assumption is that tightest  
608 binding hinders release. For some promoters, there might be overlap between two groups chosen  
609 independently.

610

### 611 **Library cloning**

612 A promoter library was ordered via Integrated DNA Technology and amplified by hybridizing with a reverse  
613 primer (hybridization protocol: 95°C for 3min, 55°C for 1min, 72°C for 1min). The product was subsequently  
614 cleaned up using PCR cleanup kit (Omega Biotek) and stored in dH<sub>2</sub>O. Backbone preparation started with  
615 PCR amplification of plasmid pXL-9. For Rosetta designed sigma variants, 110-base pair (bp) single strand  
616 DNA oligo pool containing Rosetta designed sigma fragments were ordered from Agilent. Oligo design  
617 features unique priming regions at 5' and 3' for individual libraries complemented with BsaI recognition sites  
618 and cutting sites to enable Goldengate cloning. 10ng of the oligo pool was used in the PCR reaction to  
619 amplify individual libraries (PCR protocol: 95°C for 3min, 98°C for 20sec, 55°C for 15sec, 72°C for 8sec,  
620 cycling from step 2 for 20 cycles, 72°C for 30sec). PCR product was subsequently cleaned up using PCR  
621 cleanup kit (Omega Biotek) and stored in dH<sub>2</sub>O. Backbone preparation started with PCR amplification of  
622 plasmid SC101\_LacI\_WTsigma containing a WT sigma-70 driven by pLacO promoter. Amplified backbone  
623 bared the corresponding BsaI binding and cutting sites, enabling scarless cloning. Backbone PCR was  
624 cleaned up and subject to sequential digestion of DPN1 and BsaI\_HF\_V2 (New England Biolab) to remove  
625 the template DNA and expose sticky overhangs. The digested backbone was further incubated with  
626 Antarctic Phosphatase (New England Biolab) to remove 5' and 3' phosphates. The removal of those  
627 phosphates prevents backbones from circularizing and creating false positive transformants. The  
628 Goldengate reaction was done as described on New England Biolab. Briefly, 300ng of the backbone was  
629 combined with 70ng of the library in a 20µL reaction. The mix was incubated at 37°C for 1hr and 65°C for

630 5min. Cooled reaction mix was dialyzed on 0.02 $\mu$ m filter in dH<sub>2</sub>O for 1hr at room temperature. The dialyzed  
631 sample was collected and stored at -20°C.

632

### 633 **Transformation of promoter and redesigned sigma-70 libraries**

634 Library transformation was conducted using electrocomponent DH10 $\beta$  *E. coli* (New England Biolab). 2 $\mu$ L  
635 of the assembled library reaction mix was transformed with 25 $\mu$ L cells and recovered with 1mL SOC  
636 medium at 37°C for 1hr. Multiple logs of dilutions were plated on appropriate antibiotic plate to measure  
637 transformation efficiency. 4mL of LB and antibiotics were added to ensure proper growth selection. Cultures  
638 were grown overnight before being stored in 25% glycerol at -80°C. For non-library transformations, 10ng  
639 DNA was added directly to 25 $\mu$ L of cells and plated on agar plates containing antibiotics to confer selection.  
640 Co-transformations were conducted by first growing cells containing one plasmid in LB medium with  
641 appropriate antibiotics overnight. 1:50 back dilution was then done into 3mL LB without antibiotics. Cells  
642 were allowed to grow until reaching an OD<sub>600nm</sub> of 0.6 before being chilled on ice. Chilled cells were spun  
643 down at 5000xg and thoroughly washed with ice cold dH<sub>2</sub>O twice. The final cell pellet was suspended in  
644 25 $\mu$ L of ice cold dH<sub>2</sub>O. Electroporation was then repeated similarly to regular plasmid transformation.  
645 Transformed cells were plated onto agar plates with appropriate antibiotics overnight at 37°C before storage  
646 at 4°C.

647

### 648 **Induction and fluorescence measurement**

649 Multiple colonies were picked from agar plates and inoculated into 150 $\mu$ L LB medium in a 96-well plate  
650 containing appropriate antibiotics. Cells were allowed to grow shaking (900rpm, multi-well plate shaker,  
651 Southwest Scientific) at 37°C for around 3hr or until OD<sub>600nm</sub> reached 0.6. Cultures were back inoculated  
652 into two technical replicates of fresh LB medium with appropriate antibiotics at 1:20 dilution factor. After  
653 around 3hr or upon reaching an OD<sub>600nm</sub> of 0.3, IPTG (at final concentration of 5 $\mu$ M) was added to one of  
654 the two technical replicates. Cells were incubated for 5hr before fluorescence measurement. Fluorescence  
655 measurements were conducted using a multi-well platereader (HTX Biotek). Excitation and emissions  
656 wavelengths of 485nm and 528nm ( $\pm$  20) were used for all measurements. Measurements were normalized  
657 by dividing fluorescence intensities by the OD<sub>600nm</sub> before subtracting blank well fluorescence (cells carrying

658 no GFP). Fold-improvement was calculated by dividing normalized the IPTG induced fluorescence of  
659 sigma-70 variants by the IPTG induced fluorescence of WT sigma-70 containing cells using the same target  
660 promoter sequence. Average fold improvement was calculated from at least 3 biological replicates.

661

### 662 **Fluorescence activated cell sorting**

663 Around 25 $\mu$ l of reporter transformed libraries carrying a target promoter upstream of GFP were inoculated  
664 into 3mL LB kan/spec-50 (kanamycin and spectinomycin at 50 $\mu$ g/mL) from glycerol stock and grown  
665 overnight at 37°C in a shaking incubator. Cultures were inoculated into two separate 150 $\mu$ L fresh LB  
666 kan/spec-50 in a 96-well plate at 1:50 dilution. Fresh cultures grew shaking at 37°C for 3hr or until reaching  
667 an OD<sub>600nm</sub> of 0.3. IPTG was added to a final concentration of 5 $\mu$ M to one technical replicate for induction.  
668 After the addition of IPTG, cultures were grown for 5hr before being chilled on ice. Chilled cultures were  
669 added to ice cold phosphate buffer saline (PBS) at 1:50 ratio and mixed well before being put back onto  
670 the ice. Cell sorting was conducted using a Sony SH800 cell sorter (Sony Biotech) (condition: FCS  
671 threshold=2500, 50% PMT on GFP, ultra-purity, round 8k events/second). Three independent replicates  
672 were sorted. Briefly, cells in PBS were flowed through first to capture the distribution. Under 5 $\mu$ M IPTG  
673 induced condition, top 10% cells were sorted out (at least 50k events). Sorted populations were flowed  
674 through the sorter to capture sorting efficiency (percentage of cells fall back into the sorted gate). Sorted  
675 cells with less than 80% efficiencies were sorted using the same gate again to improve the purity. Sorted  
676 cells were recovered in 1mL LB medium shaking at 37°C. 100 $\mu$ L (1:10 dilution) of cells were plated onto  
677 LB agar plates with appropriate antibiotics. The rest were growing overnight in 3ml LB with appropriate  
678 antibiotics before being minipreped into plasmid. Promoter library sorting was done by simply isolating 5%  
679 of cells with lowest fluorescence.

680

### 681 **Variant identification using next generation sequencing (NGS)**

682 A pair of primers upstream and downstream of the mutated sigma-70 region were used to add partial  
683 Illumina adaptors. Priming sites were at least 20 base pair away from the variable regions to ensure good  
684 quality base calling during NGS. Amplicon size was 120 base pair. Amplicons were sequenced on  
685 Amplicon-EZ Miseq service (Genewiz) with at least 50k reads for each sigma library. Sequenced libraries

686 were processed with PEAR pair-ended merger (quality threshold set to 35). Merged reads were processed  
687 with custom script to identify variants. Briefly, sigma-70 variable regions were extracted and converted into  
688 amino acids with corresponding frequency. Reads with frequencies of less than 5 were removed. Variant  
689 frequency was normalized against total reads to get percentages. To compute individual variant's  
690 enrichment, a variant's percentage under 10 $\mu$ M IPTG induction was divided by that of the condition without  
691 IPTG. Sequence logos for variants with highest enrichment were generated using ISA-tools.<sup>48</sup>

692

### 693 **Clonal identification**

694 To identify functional sigma-70 variants, 100 colonies were sampled from the sorted populations. Highly-  
695 functional (defined by its fold improvement level) colonies were measured using the above protocol for plate  
696 reader measurements, and high performing colonies were subsequently identified using Sanger  
697 sequencing. Unique high-performing variants were then inoculated in 3 mL kan/spec LB media and grown  
698 overnight. Following overnight growth, plasmids from these variants were extracted using the protocol for  
699 plasmid mini-prep. Following plasmid extraction, plasmids from these variants were re-transformed into  
700 DH10 $\beta$  *E. coli* in order to normalize for variations in the *E. coli* genome of sorted cells that may have led to  
701 false positives in GFP transcription during clonal testing. Using three biological replicates, the re-  
702 transformed sigma-70 variants were measured once again using the induction protocol from initial clonal  
703 screens. High-performing sigma-70 variants were measured alongside cells containing WT sigma-70 and  
704 the orthogonal promoter sequences to ensure that fold-improvement scores are consistent across  
705 measurements.

706

707 **SUPPLEMENTARY INFORMATION**

708 **Supplementary Table 1. Normalized fluorescence measurements of clones containing randomized**

709 **-35 sequences.** GFP fluorescence and OD<sub>600nm</sub> measurements were collected with a 96-well plate reader.

710 Hamming distances for each sequence are relative to the canonical -35 element. The five selected low

711 activity -35 targets are highlighted in green.

712

| -35 sequence | Normalized fluorescence (RFU OD <sup>-1</sup> ) | Hamming distance from TTGACA |
|--------------|-------------------------------------------------|------------------------------|
| ATGACT       | 316                                             | 2                            |
| AAGCCA       | 426                                             | 3                            |
| TTATCC       | 488                                             | 3                            |
| TTCATC       | 320                                             | 3                            |
| TTCTCC       | 492                                             | 3                            |
| AGGATG       | 627                                             | 4                            |
| ATACCC       | 340                                             | 4                            |
| ATATCC       | 381                                             | 4                            |
| ATCTCT       | 420                                             | 4                            |
| CCGCCC       | 445                                             | 4                            |
| CCGCCG       | 491                                             | 4                            |
| CGGCC        | 474                                             | 4                            |
| CTCGCC       | 426                                             | 4                            |
| CTGCTC       | 452                                             | 4                            |
| CTTTCT       | 436                                             | 4                            |
| GCGAGT       | 404                                             | 4                            |
| GCGCCT       | 548                                             | 4                            |
| GCGGCC       | 413                                             | 4                            |
| GGAACC       | 585                                             | 4                            |
| GTCGCC       | 439                                             | 4                            |
| TCTCCC       | 483                                             | 4                            |
| TTAGTG       | 494                                             | 4                            |
| TTCTTT       | 514                                             | 4                            |
| AAACCC       | 601                                             | 5                            |
| AAAGTA       | 497                                             | 5                            |
| AACGCC       | 475                                             | 5                            |
| AAGTGT       | 341                                             | 5                            |
| ACGGTT       | 434                                             | 5                            |
| AGACCC       | 376                                             | 5                            |
| AGAGCC       | 431                                             | 5                            |
| AGTTCC       | 478                                             | 5                            |
| ATTTTT       | 479                                             | 5                            |
| CCCTCC       | 416                                             | 5                            |
| CCTTCT       | 487                                             | 5                            |
| CGAGCC       | 413                                             | 5                            |
| CGCCCG       | 523                                             | 5                            |
| CGCGCC       | 396                                             | 5                            |
| CGGCTC       | 527                                             | 5                            |
| CGTCCT       | 533                                             | 5                            |

|        |     |   |
|--------|-----|---|
| CGTGCC | 394 | 5 |
| CGTTCT | 489 | 5 |
| CTCCTT | 459 | 5 |
| GACTCT | 422 | 5 |
| GATCCC | 421 | 5 |
| GATGCT | 397 | 5 |
| GATTCC | 436 | 5 |
| GCATCC | 454 | 5 |
| GCATCT | 491 | 5 |
| GCTTCT | 560 | 5 |
| GGCCCC | 310 | 5 |
| GTCTTT | 510 | 5 |
| GTTTTT | 473 | 5 |
| TACTTT | 311 | 5 |
| TATTTT | 376 | 5 |
| TGCGTT | 327 | 5 |
| TGCTTC | 572 | 5 |
| AATTTT | 421 | 6 |
| ACATTT | 402 | 6 |
| CACTTT | 442 | 6 |
| CATTGC | 487 | 6 |
| CCCCTC | 554 | 6 |
| CCTTTC | 521 | 6 |
| CCTTTT | 314 | 6 |
| CGCTTT | 328 | 6 |
| CGTCTT | 509 | 6 |
| CGTTTC | 409 | 6 |
| CGTTTT | 401 | 6 |
| GAATGT | 316 | 6 |
| GACTTT | 354 | 6 |
| GATCTT | 457 | 6 |
| GATTTT | 363 | 6 |
| GCCTTT | 349 | 6 |
| GCTTTT | 400 | 6 |
| GGCTTT | 413 | 6 |

713

714

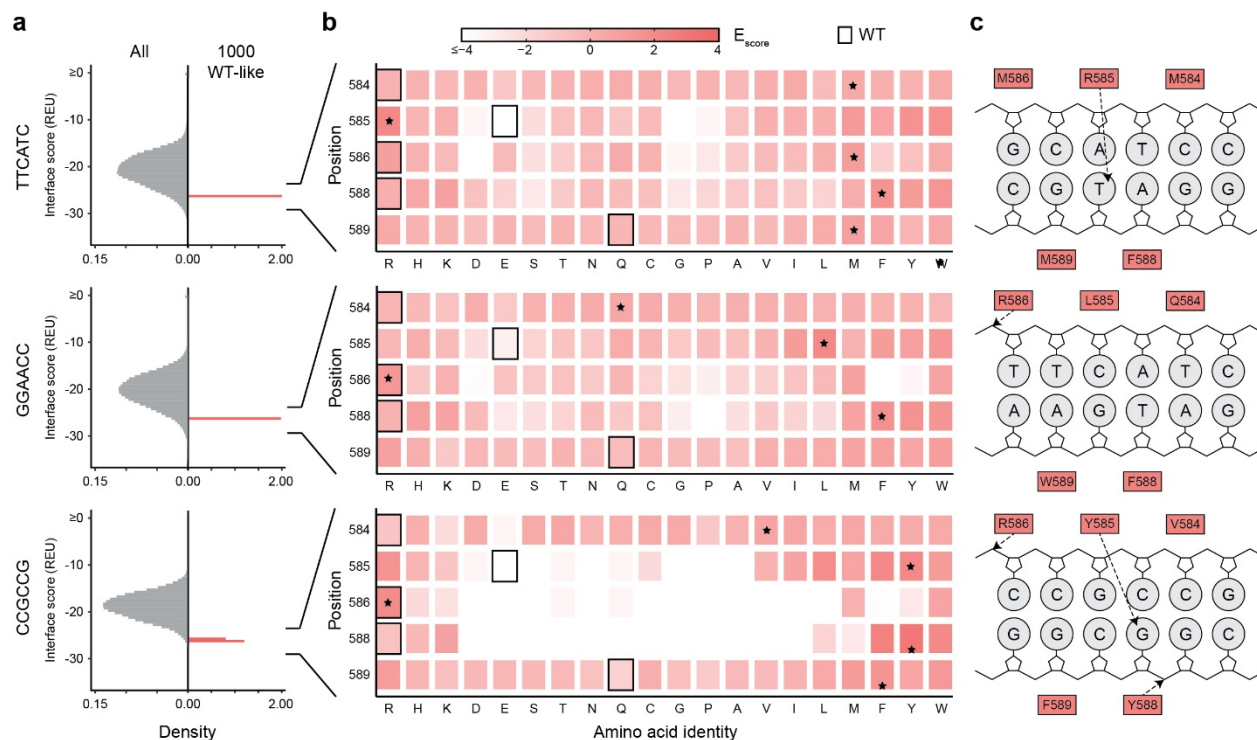

715

716 **Supplementary Fig. 1. Computation-based selection of redesigned sigma-70 variants for three**  
 717 **promoter targets.** (a), Interface scores of all (gray) or 1000 most WT-like (Interface score = -26REU, red)  
 718 sigma-70 variants in complex with each -35 DNA target. WT-like sets were not created for promoter targets  
 719 CCCCTC and GCATCC because they were redundant with the lowest energy sets. All single, double, triple,  
 720 and quadruple combinatorial variants of sigma-70 positions 584, 585, 586, 588, and 589 were modeled  
 721 using Rosetta. (b), Position-specific amino acid enrichment scores (red gradient) among selected wt-like  
 722 scoring sigma-70 variants. WT identity (boxed outline) and most enriched amino acid (\*) at each mutable  
 723 position. (c), Cartoon schematic showing H-bonds formed between each enriched sigma-70 consensus  
 724 sequence and -35 DNA target in the Rosetta structural models.  
 725



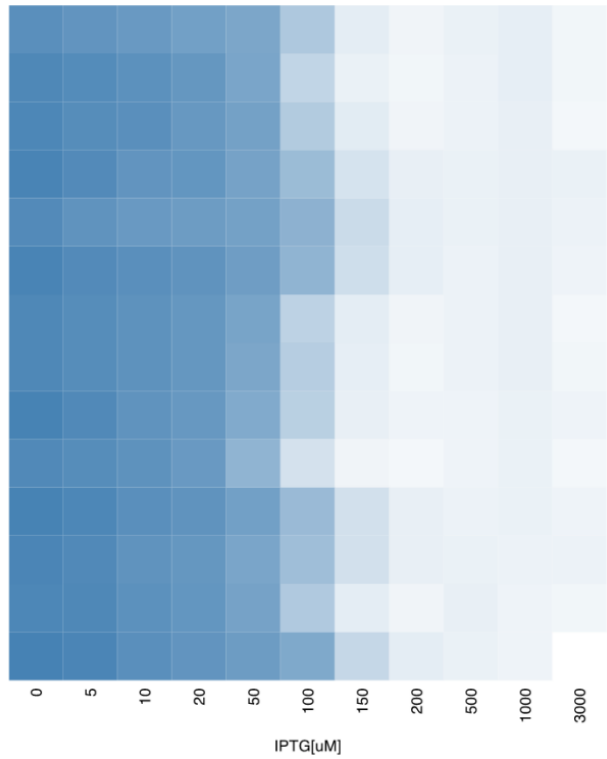

726

727 **Supplementary Fig. 2. Sigma-70 expression induced toxicity.** Each row corresponds to a different  
728 sigma-70 variant. Each column represents a different IPTG concentration. Color coding represents cell  
729 density measured by OD<sub>600nm</sub> after 5 hours of induction. Dark represents high cell density while white  
730 represents low cell density.  
731

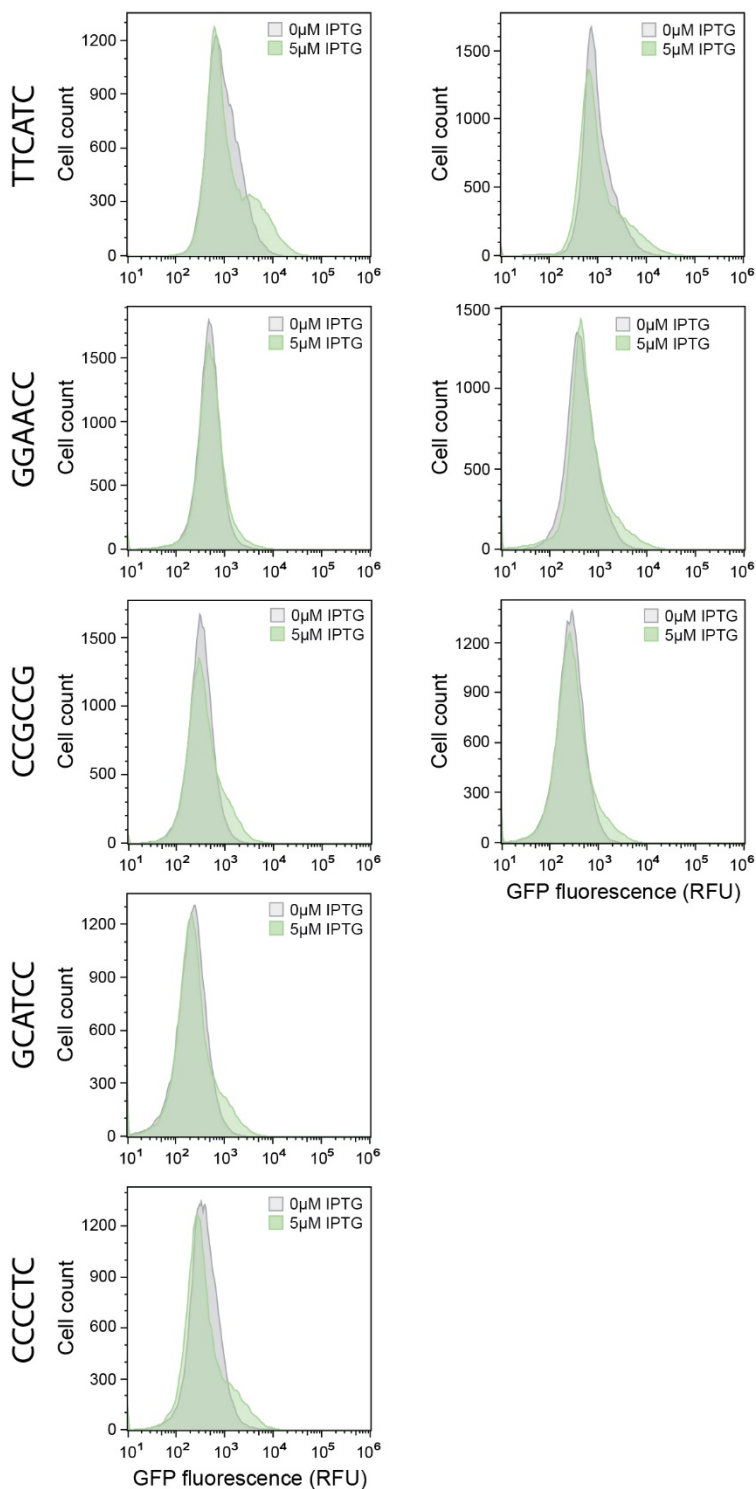

732  
733 **Fig. 3. Selection of successfully redesigned sigma-70 variants.** Flow cytometry fluorescence  
734 distributions of uninduced (gray) and IPTG induced (green) sigma-70 variant populations for each -35 target  
735 prior to FACS-based selection of functional redesigns. Transcriptionally active variants were enriched by  
736 sorting the GFP positive subpopulation of the lowest energy (left) and WT-like (right) libraries of each target.  
737

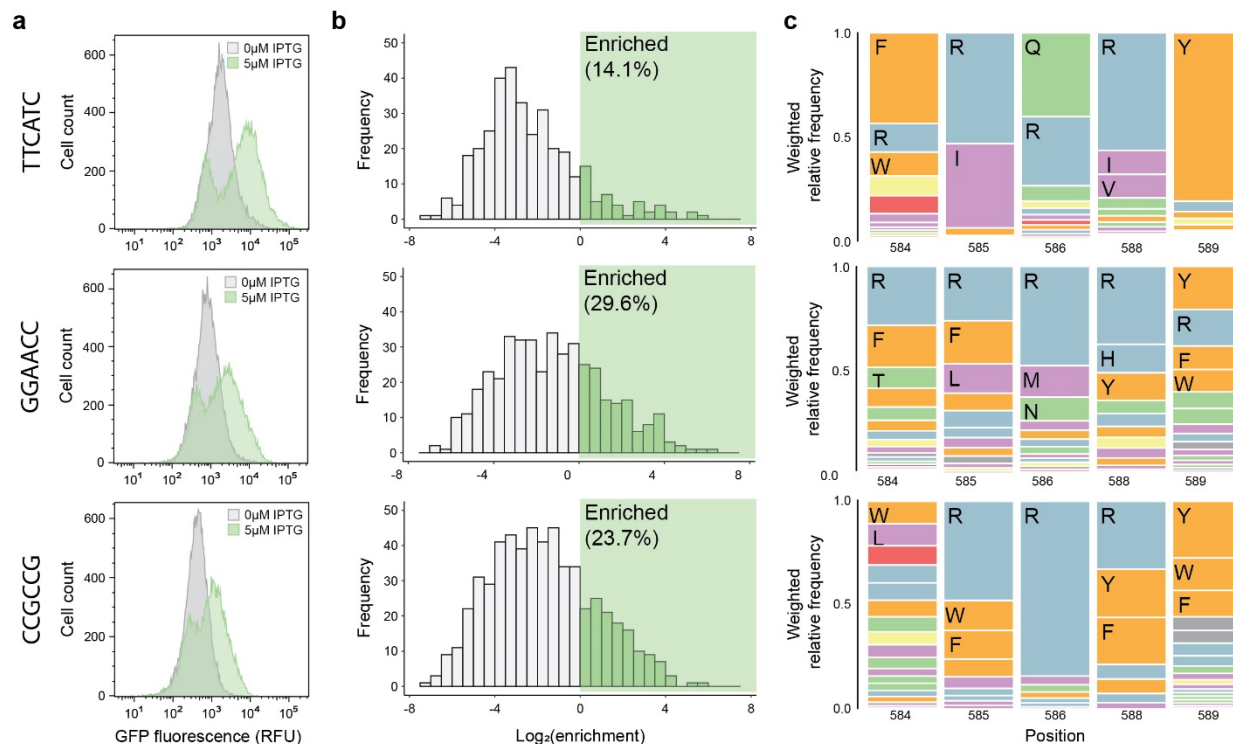

738  
739 **Supplementary Fig. 4. Selection and identification of successfully redesigned sigma-70 variants.**  
740 (a), Flow cytometry fluorescence distributions of uninduced (gray) and IPTG induced (green) sigma-70  
741 variant populations for three -35 targets after FACS-based selection of functional redesigns.  
742 Transcriptionally active variants from the WT-like libraries were enriched using two rounds of sequential  
743 GFP positive cell sorting. (b), Distributions of log-transformed enrichment scores of all characterized sigma-  
744 70 variants after selection. Deep sequencing was performed on the presorted and sorted libraries to  
745 compute enrichment ratios. (c), Sequence logos showing the weighted amino acid frequencies at each  
746 mutable position among functionally enriched sigma-70 variants. Amino acid identities are colored by  
747 chemical properties: polar amino acids (N, Q, S, T) shown in green, basic (H, K, R) blue, acidic (D, E) red,  
748 hydrophobic (A, I, L, M, V) purple, aromatic (F, W, Y) orange, and other (C, G, P) gray.  
749

|        |        |        |        |        |        |
|--------|--------|--------|--------|--------|--------|
| CCCCTC |        |        |        |        |        |
| CCGCCG | 3      |        |        |        |        |
| GCATCC | 4      | 4      |        |        |        |
| GGAACC | 5      | 5      | 2      |        |        |
| TTCATC | 3      | 6      | 5      | 4      |        |
|        | CCCCTC | CCGCCG | GCATCC | GGAACC | TTCATC |

750  
751  
752  
753

**Supplementary Fig. 5. Hamming distances between each of the five selected -35 targets.**

754 **Supplementary Table 2. Clonal screens of sigma variants after FACS-based selection of high**  
755 **activity variants.** GFP fluorescence and OD<sub>600nm</sub> measurements were collected with a 96-well plate reader.  
756 96 clones were tested for each -35 target. Normalized GFP fluorescence was compared to WT sigma on  
757 each target to compute fold-improvement.  
758

| -35 target | Total number of clones screened | Number of clones with fold-improvement $\geq 4$ |
|------------|---------------------------------|-------------------------------------------------|
| GGAACC     | 96                              | 50                                              |
| CCCCTC     | 96                              | 21                                              |
| TTCATC     | 96                              | 51                                              |
| GCATCC     | 96                              | 23                                              |
| CCGCCG     | 96                              | 35                                              |

759  
760

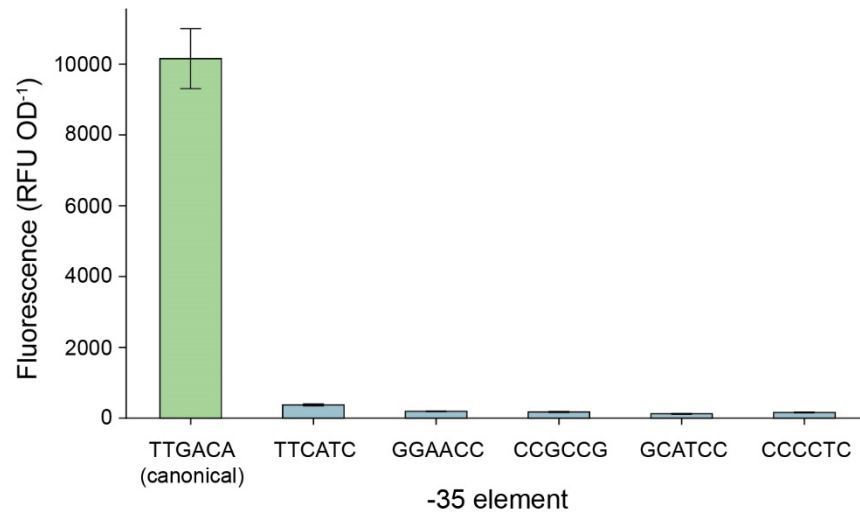

761

762 **Supplementary Fig. 6. Activity of endogenous WT sigma-70 on the canonical and target -35**

763 **elements.** GFP fluorescence and OD<sub>600nm</sub> measurements (n ≥ 3) were collected with a 96-well plate reader.
